# Supplementary material
Source: PubMed Central journal article supplement (PMC8570791)
Supplement: iyab143_supplementary_data.pdf [file iyab143_supplementary_data.pdf]

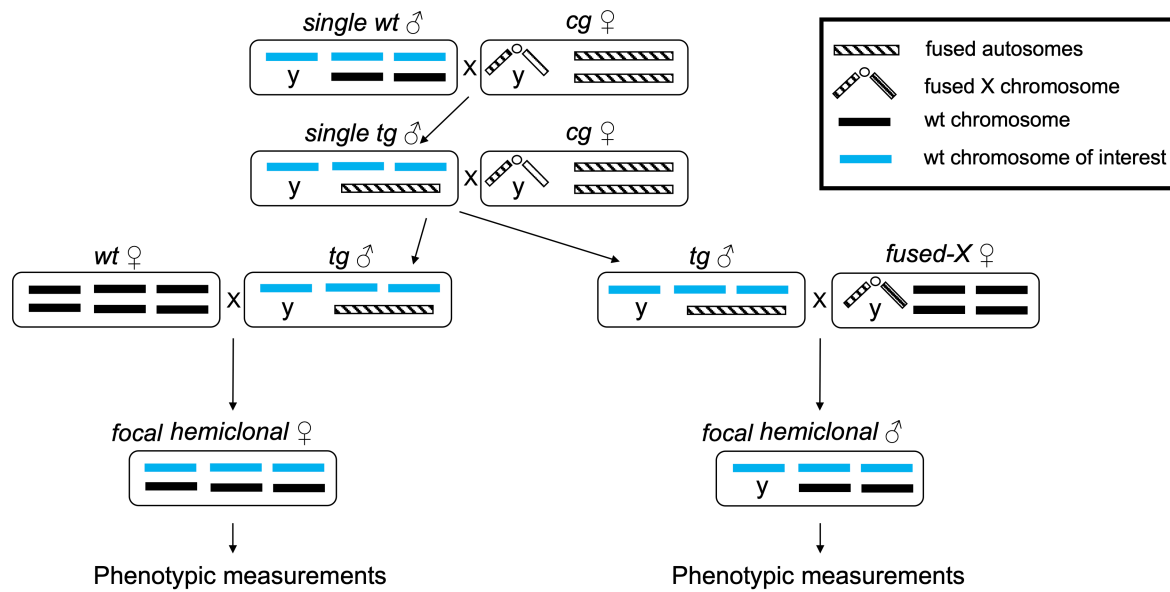

1

2

3 **Supplementary Figure 1. The process of amplifying and generating focal hemiclones**

4 **used in male and female fitness measurements.** By sampling random wild-type males from

5 LH<sub>M</sub> to initiate the first wild-type (wt) x clone-generator (cg) cross, multiple hemiclone

6 lines—each carrying a random and unique X-2-3 chromosomal complement, or “target

7 genomes” (tg)—from LH<sub>M</sub> are thus generated. A further cross of these hemiclone tg males to

8 either wild-type females or fused-X females produces “focal” hemiclone females and males,

9 respectively. Measurements of fitness were performed on these individuals (as described in

10 Ruzicka *et al.* 2019). See Abbott and Morrow (2011) for further details on the hemiclone

11 amplification process.

12

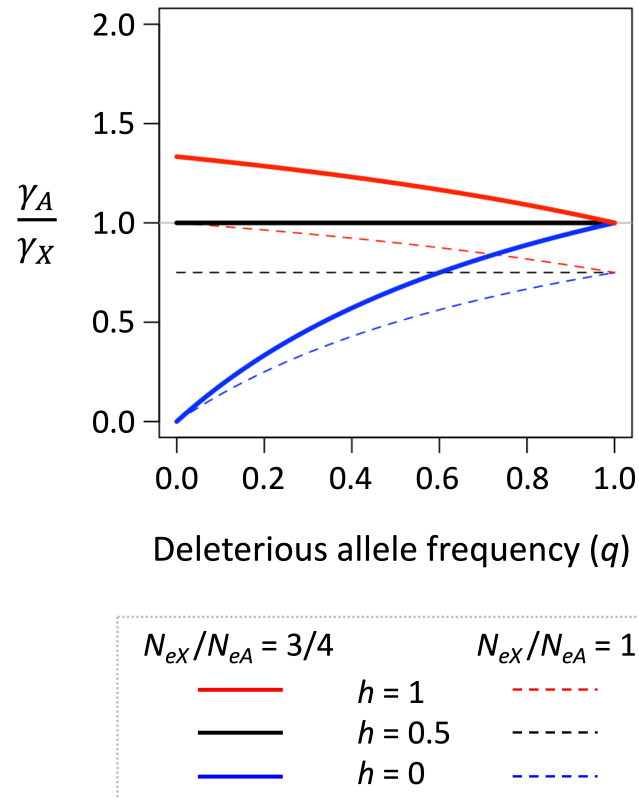

13

14 **Supplementary Figure 2. Effects of dominance and effective population size on the**

15 **efficacy of purifying selection at autosomal versus X-linked loci.** The relative efficacy of

16 autosomal and X-linked purifying selection can be evaluated by comparing the exponential

17 terms in the stationary distributions for X-linked and autosomal loci (*i.e.*:  $\gamma_A$  and  $\gamma_X$ ,

18 respectively). Purifying selection tends to be effectively stronger on the X ( $\gamma_A/\gamma_X < 1$ ) when

19  $N_{eX} > \frac{3}{4}N_{eA}$ , and dominance further elaborates on baseline X/autosomal differences

20 attributable to their effective population sizes.

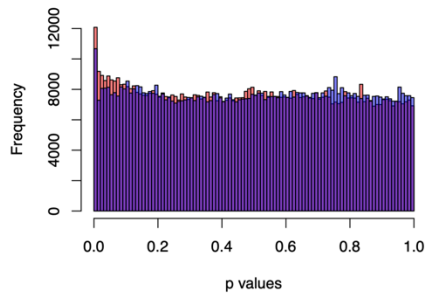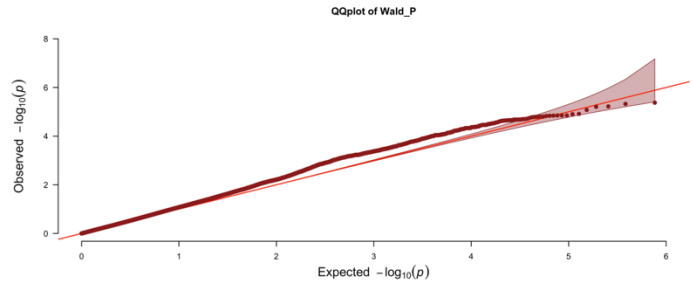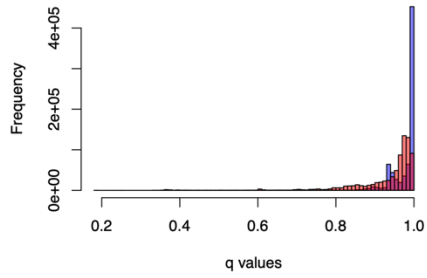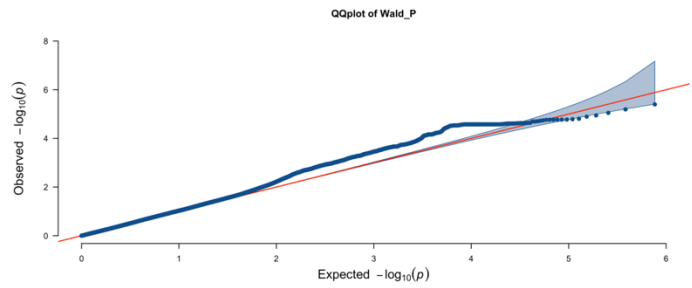

21

22 **Supplementary Figure 3. Histogram of p- and q-values, and quantile-quantile plots,**

23 **from GWAS of female fitness (red) and male fitness (blue).**

24

**Female**

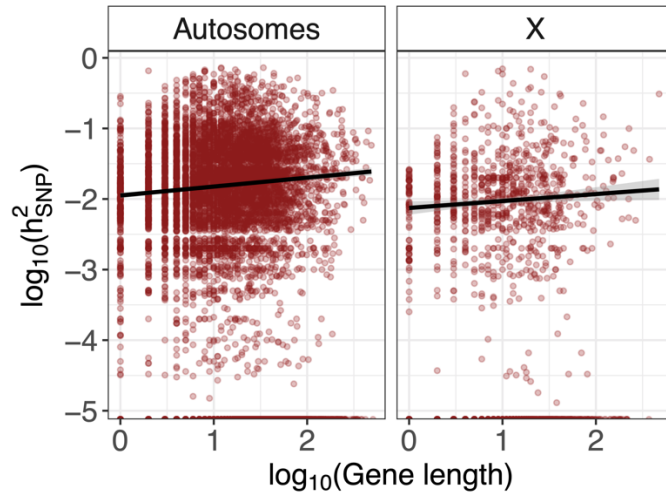

**Male**

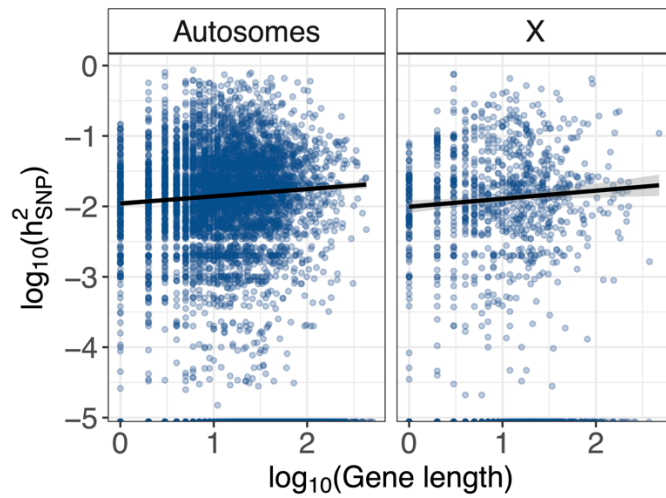

25

26 **Supplementary Figure 4. Log-log plots of the “length” of a gene (i.e., the number of**  
27 **SNPs within a given gene) and its SNP-heritability, for females and males, on autosomes**  
28 **and the X, with a line of best fit from a simple linear regression presented for visual**  
29 **emphasis.**



**delta = -1**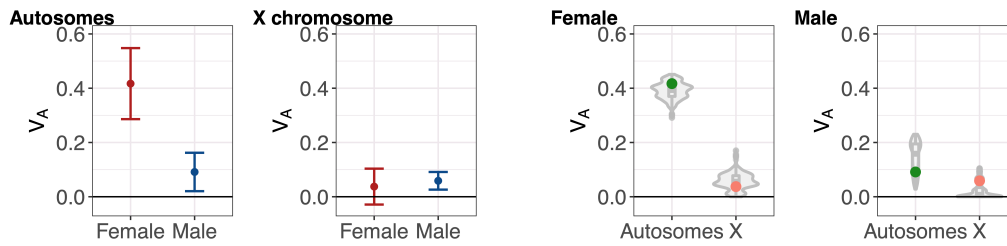**delta = 0**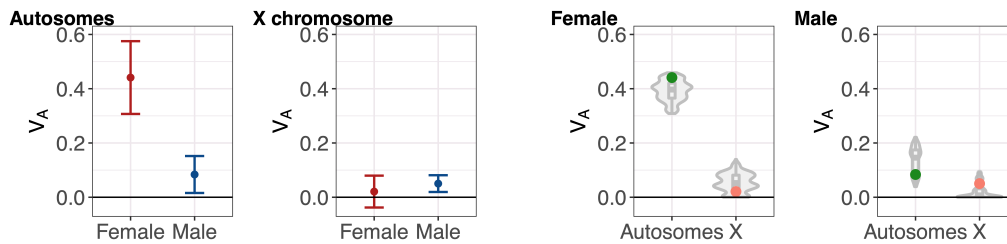

31

32 **Supplementary Figure 5.** Same as Figure 3, presented for two alternative values of  $\delta$ ,  
 33 which is used to scale SNPs by MAF when estimating kinships (see Materials and Methods;  
 34 Fig. 4 assumes  $\delta = -0.25$ ).  $V_A$  estimates are largely similar across values of  $\delta$ . Welch  $t$ -tests of  
 35 the difference between male and female variances yield the following p-values:  $p = 0.029$   
 36 ( $\delta = -1$ ; autosomes),  $p = 0.772$  ( $\delta = -1$ ; X chromosome),  $p = 0.018$  ( $\delta = 0$ ; autosomes),  $p = 0.658$   
 37 ( $\delta = 0$ ; X chromosome). The proportional contribution of the X to total  $V_A$  in each sex yields  
 38 the following p-values in females ( $p = 0.218$ ,  $\delta = -1$ ;  $p = 0.175$ ,  $\delta = 0$ ) and males ( $p = 0.187$ ,  $\delta = -1$ ;  
 39  $p = 0.174$ ,  $\delta = 0$ ). The ratio of the contributions of the X to total  $V_A$  in males vs. females yields  
 40 the following p-values:  $p = 0.159$  ( $\delta = -1$ ),  $p = 0.088$  ( $\delta = 0$ ).

41

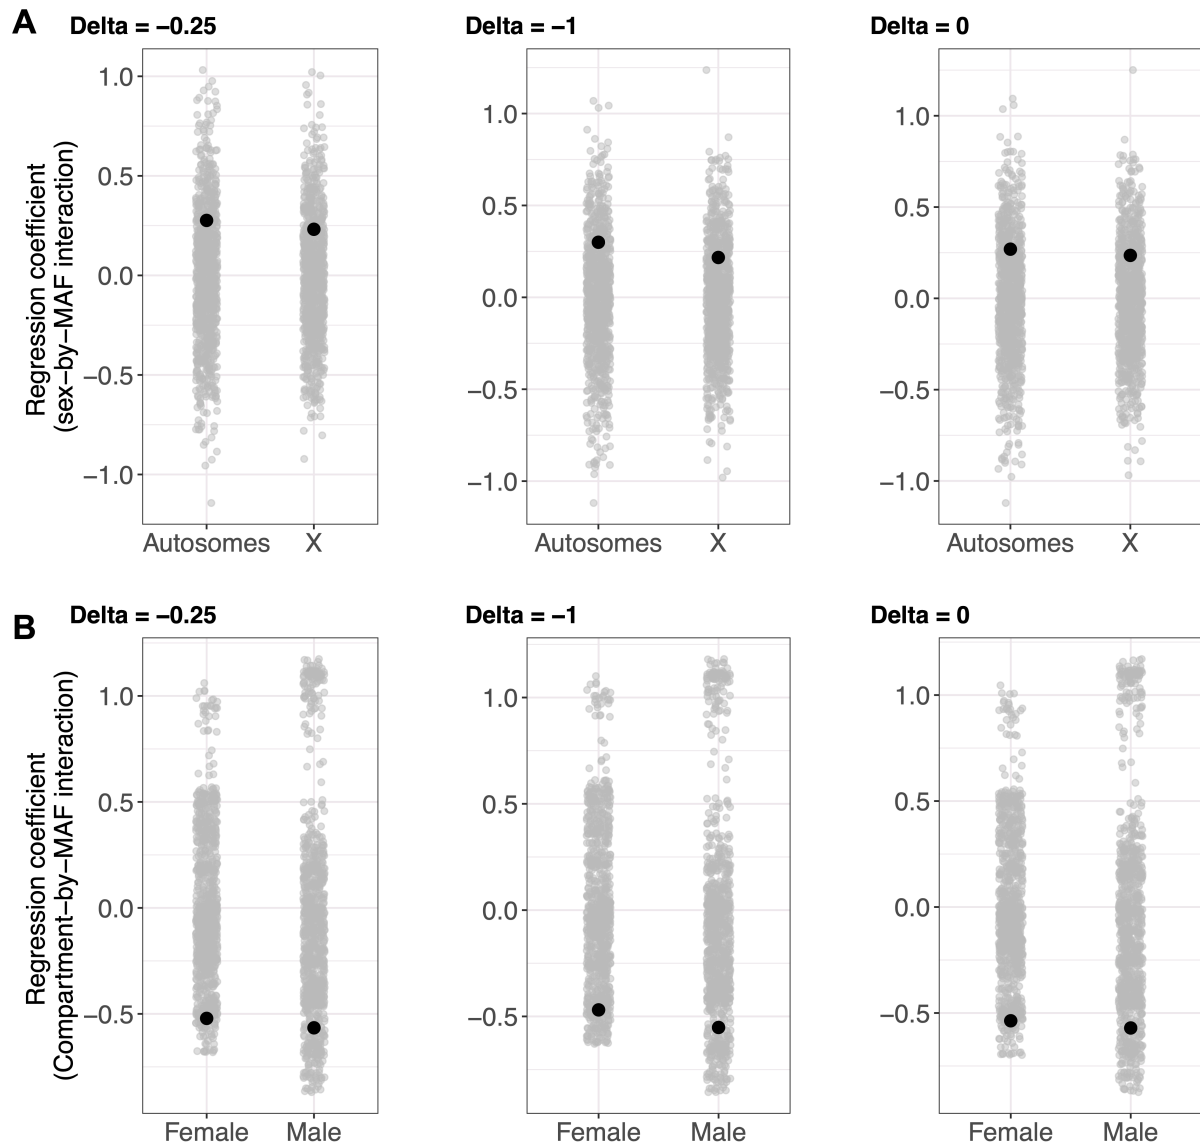

42

43 **Supplementary Figure 6. A. Regression coefficients for the sex-by-MAF interaction**

44 **obtained from a GLM of  $|\alpha|$  (intercept=female).** Dots denote regression coefficients

45 (black, observed; grey, permuted), presented for different values of  $\delta$ , which is used to scale

46 SNPs by MAF when estimating kinships (see Materials and Methods). For autosomes,

47 empirical p-values for the sex-by-MAF interaction were as follows:  $p=0.287$  ( $\delta=-0.25$ ),

48  $p=0.243$  ( $\delta=-1$ ),  $p=0.285$  ( $\delta=0$ ). For the X chromosome, empirical p-values for the sex-by-

49 MAF interaction were as follows:  $p=0.429$  ( $\delta=-0.25$ ),  $p=0.457$  ( $\delta=-1$ ),  $p=0.430$  ( $\delta=0$ ).

50 **Regression coefficients for the compartment-by-MAF interaction obtained from a GLM**

51 **of  $|\alpha|$  (intercept=autosomes).** Dots denote regression coefficients (black, observed; grey,

52 permuted). For females, empirical p-values for the compartment-by-MAF interaction were as  
53 follows:  $p=0.033$  ( $\delta=-0.25$ ),  $p=0.078$  ( $\delta=-1$ ),  $p=0.032$  ( $\delta=0$ ). For males, empirical p-values  
54 for the compartment-by-MAF interaction were as follows:  $p=0.095$  ( $\delta=-0.25$ ),  $p=0.105$   
55 ( $\delta=-1$ ),  $p=0.094$  ( $\delta=0$ ).

56

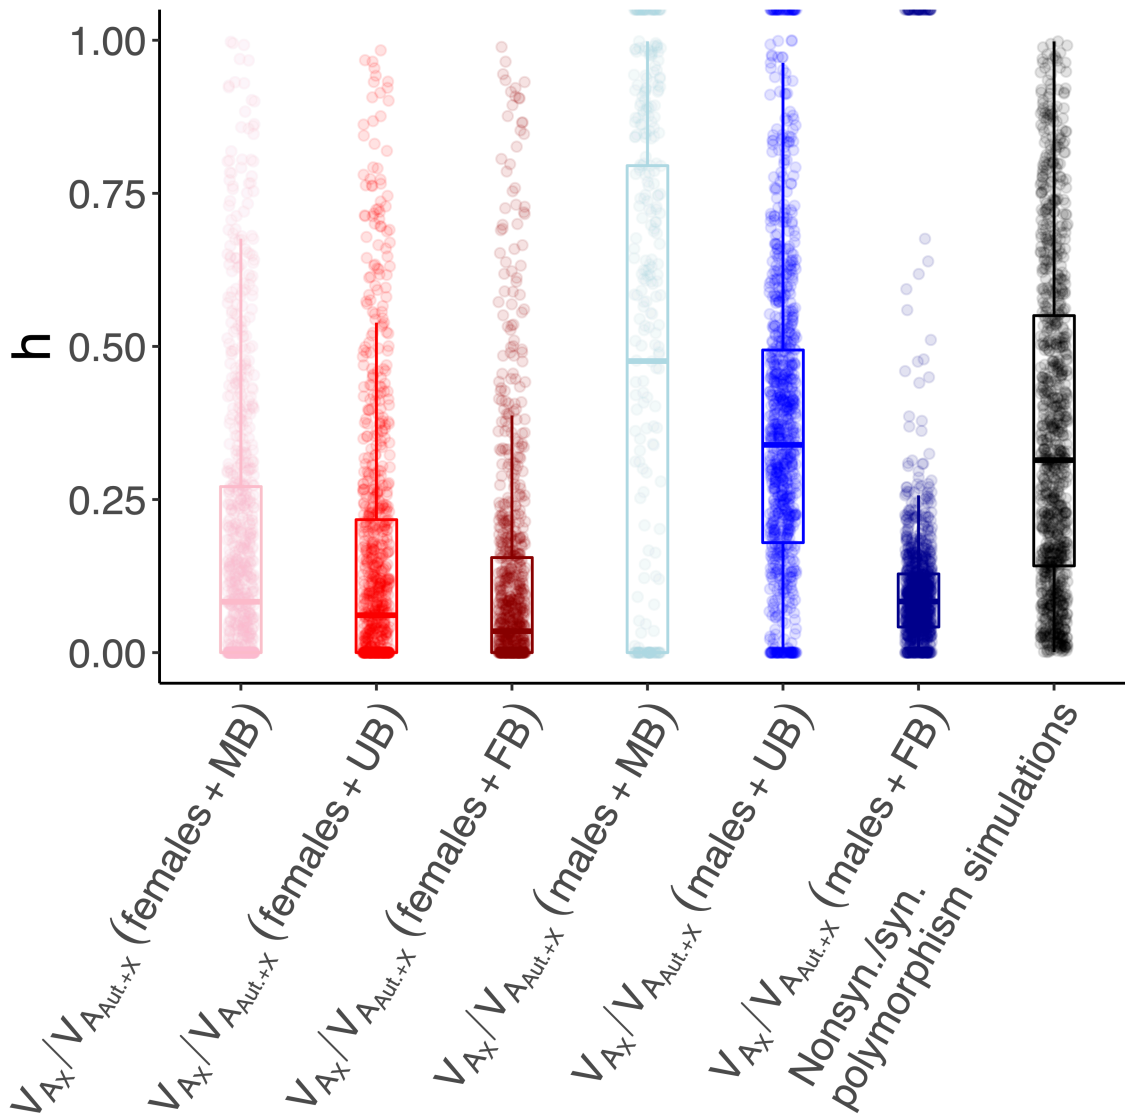

57

58 **Supplementary Figure 7. Quantitative and population genetic inferences of dominance,**

59 **relaxing the  $s_m/s_f=1$  assumption of Fig. 6A.** Boxplots of  $h$  estimates, based on quantitative

60 genetic data (the fraction of total  $V_A$  that is X-linked in females, left; the fraction of total  $V_A$

61 that is X-linked in males, middle) and population genetic data (coefficients in a logistic

62 regression of nonsynonymous/synonymous status on MAF and chromosome compartment).

63 For visualisation purposes,  $h$  estimates greater than one and smaller than zero are not

64 presented. MB denotes  $s_m/s_f=2$ ; UB denotes  $s_m/s_f=1$ ; FB denotes  $s_m/s_f=0.5$ .

65

66

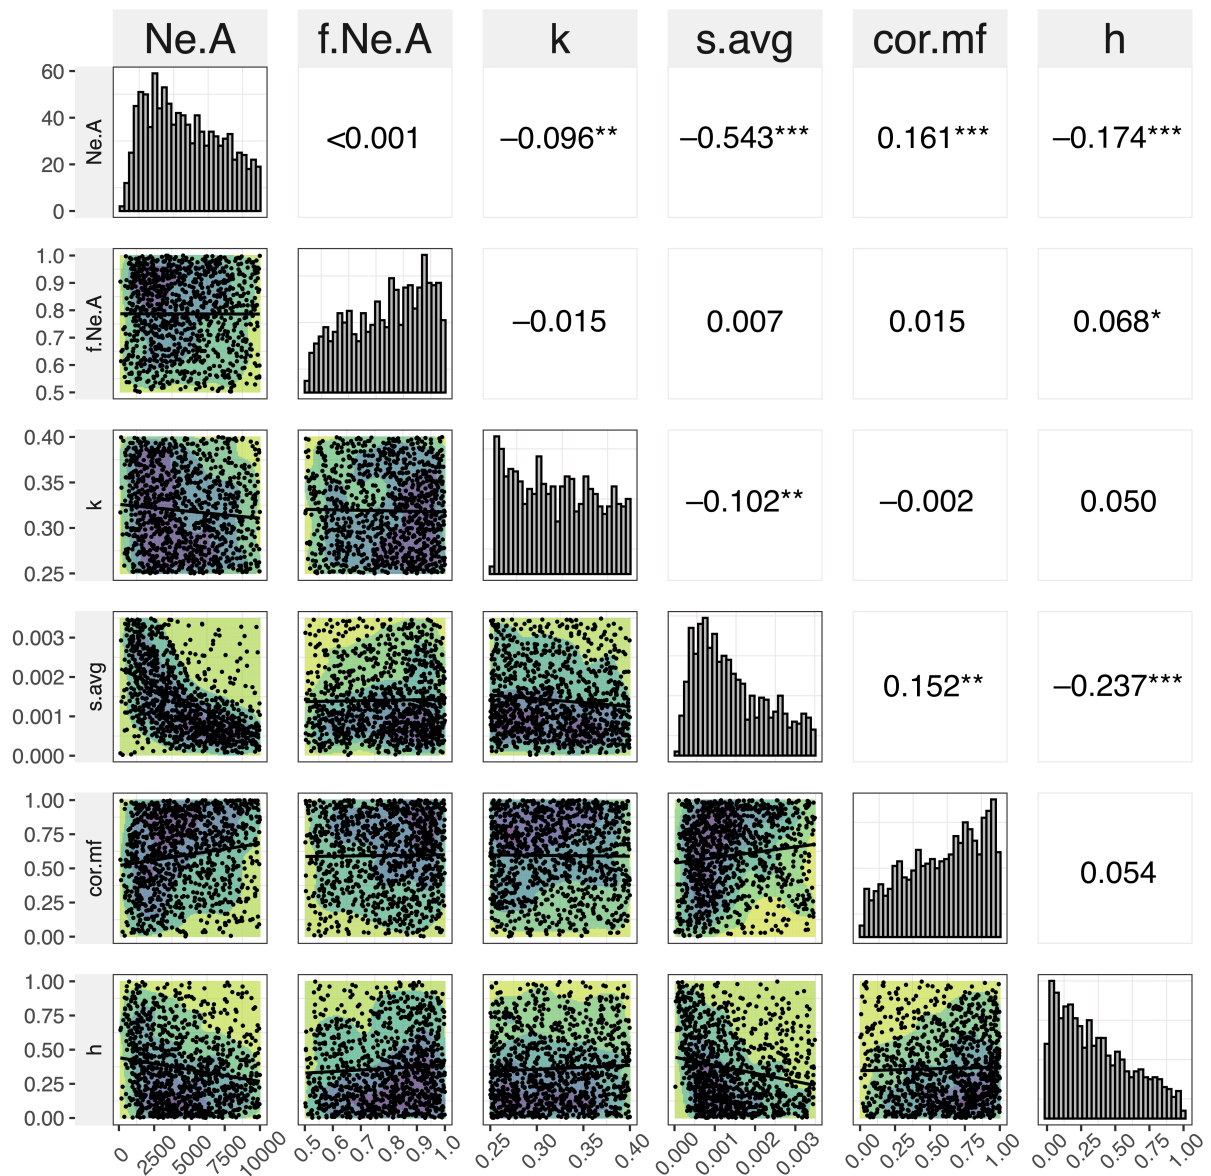

67

68 **Supplementary Figure 8. Posterior distributions and correlations between evolutionary**

69 **parameters.** Same as Figure 6B, but including the full set of parameters simulated in the

70 Approximate Bayesian Computation approach ( $f.Ne.A = N_{eX}/N_{eA} - s.avg = \bar{s} - cor.mf = r$ ).

71 \*\*\* $p < 0.001$ ; \*\* $p < 0.01$ ; \* $p < 0.05$  from Spearman's rank correlations.

72

73

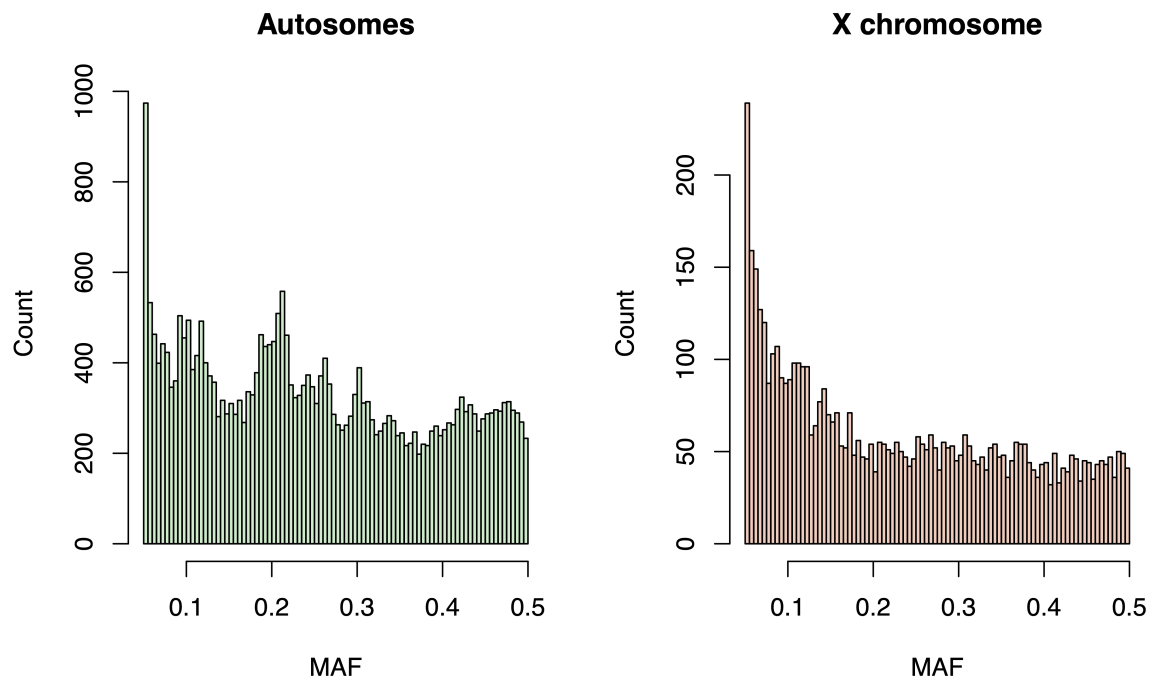

74

75 **Supplementary Figure 9. Allele frequency spectra for LD-pruned autosomal and X-**  
76 **linked sites in  $LH_M$ .**

77

78

79 **Supplementary Table 1. List of candidate gene IDs (N=70 for females; N=22 for males),**  
80 **with p-values from a Likelihood Ratio Test, FDR q-values (maximum q-value=0.3), and**  
81 **sex.**

82

| Gene_Name          | Gene_Symbol | LRT_P_Raw  | LRT_q_value | Sex    |
|--------------------|-------------|------------|-------------|--------|
| Prtl99C            | FBgn0039707 | 6.06E-06   | 0.02414841  | Female |
| Cad99C             | FBgn0039709 | 2.39E-06   | 0.02414841  | Female |
| RpS8               | FBgn0039713 | 7.30E-06   | 0.02414841  | Female |
| snoRNA:Me28S-A2564 | FBgn0065066 | 1.13E-05   | 0.02414841  | Female |
| Zip99C             | FBgn0039714 | 1.02E-05   | 0.02414841  | Female |
| CG34133            | FBgn0083969 | 7.85E-06   | 0.02414841  | Female |
| CG31038            | FBgn0051038 | 9.13E-06   | 0.02414841  | Female |
| Drice              | FBgn0019972 | 1.61E-05   | 0.02628576  | Female |
| Atg16              | FBgn0039705 | 1.75E-05   | 0.02628576  | Female |
| CG15514            | FBgn0039712 | 1.46E-05   | 0.02628576  | Female |
| CG42592            | FBgn0260969 | 2.04E-05   | 0.02778673  | Female |
| CG15515            | FBgn0039719 | 2.53E-05   | 0.03159565  | Female |
| CG15517            | FBgn0039718 | 3.94E-05   | 0.04547063  | Female |
| Rnb                | FBgn0039696 | 5.66E-05   | 0.06067553  | Female |
| CR31032            | FBgn0051032 | 0.00010917 | 0.10925006  | Female |
| CG31036            | FBgn0051036 | 0.00011677 | 0.10955215  | Female |
| dgt1               | FBgn0039710 | 0.00014552 | 0.12849416  | Female |
| Rrp4               | FBgn0034879 | 0.00016092 | 0.13419834  | Female |
| neo                | FBgn0039704 | 0.00017979 | 0.13482607  | Female |

|                        |             |            |            |        |
|------------------------|-------------|------------|------------|--------|
| CG7824                 | FBgn0039711 | 0.00018336 | 0.13482607 | Female |
| Capa                   | FBgn0039722 | 0.0001976  | 0.13482607 | Female |
| CG10802                | FBgn0029664 | 0.00019051 | 0.13482607 | Female |
| CG10803                | FBgn0029666 | 0.00023591 | 0.15396717 | Female |
| apt                    | FBgn0015903 | 0.00025906 | 0.16203124 | Female |
| lncRNA:CR44731         | FBgn0265944 | 0.00029142 | 0.16276372 | Female |
| noc                    | FBgn0005771 | 0.00029276 | 0.16276372 | Female |
| CG34200                | FBgn0085229 | 0.00028904 | 0.16276372 | Female |
| lncRNA:CR45695         | FBgn0267259 | 0.00033883 | 0.16953924 | Female |
| scaRNA:PsiU2-<br>35.45 | FBgn0263479 | 0.00032781 | 0.16953924 | Female |
| Spg7                   | FBgn0024992 | 0.00032318 | 0.16953924 | Female |
| lncRNA:CR45726         | FBgn0267290 | 0.00039823 | 0.17903405 | Female |
| lncRNA:CR44126         | FBgn0264957 | 0.00040768 | 0.17903405 | Female |
| CG42342                | FBgn0259244 | 0.00040875 | 0.17903405 | Female |
| Gas8                   | FBgn0029667 | 0.00041744 | 0.17903405 | Female |
| lncRNA:CR34335         | FBgn0267910 | 0.00037866 | 0.17903405 | Female |
| chinmo                 | FBgn0086758 | 0.00052025 | 0.20706549 | Female |
| lncRNA:CR44732         | FBgn0265945 | 0.00055177 | 0.20706549 | Female |
| lncRNA:CR44730         | FBgn0265943 | 0.00051457 | 0.20706549 | Female |
| Pi3K59F                | FBgn0015277 | 0.00053136 | 0.20706549 | Female |
| CG2662                 | FBgn0024993 | 0.0005384  | 0.20706549 | Female |
| Gp210                  | FBgn0266580 | 0.00058637 | 0.20969652 | Female |
| Act42A                 | FBgn0000043 | 0.00058672 | 0.20969652 | Female |
| lncRNA:CR45693         | FBgn0267257 | 0.00061298 | 0.21398704 | Female |



|                  |             |            |            |        |
|------------------|-------------|------------|------------|--------|
| CG14270          | FBgn0029665 | 0.00063302 | 0.21596053 | Female |
| tRNA:Pro-AGG-1-1 | FBgn0028882 | 0.00068841 | 0.21986644 | Female |
| tRNA:Gly-GCC-1-7 | FBgn0011865 | 0.00067783 | 0.21986644 | Female |
| Gyc89Db          | FBgn0038436 | 0.00068629 | 0.21986644 | Female |
| sro              | FBgn0262112 | 0.00076371 | 0.23883439 | Female |
| wmd              | FBgn0034876 | 0.00081869 | 0.24096776 | Female |
| levy             | FBgn0034877 | 0.00079521 | 0.24096776 | Female |
| lncRNA:CR44945   | FBgn0266250 | 0.00080867 | 0.24096776 | Female |
| lncRNA:CR45303   | FBgn0266841 | 0.00089756 | 0.25910141 | Female |
| Cpr35B           | FBgn0028871 | 0.00096038 | 0.27200498 | Female |
| tRNA:Gly-GCC-1-4 | FBgn0011862 | 0.0009941  | 0.27634139 | Female |
| ed               | FBgn0000547 | 0.0011256  | 0.27644451 | Female |
| CG15283          | FBgn0028844 | 0.0011184  | 0.27644451 | Female |
| ZnT41F           | FBgn0025693 | 0.0011273  | 0.27644451 | Female |
| pita             | FBgn0034878 | 0.0010835  | 0.27644451 | Female |
| CG10405          | FBgn0038431 | 0.0011179  | 0.27644451 | Female |
| CG7829           | FBgn0039703 | 0.0010511  | 0.27644451 | Female |
| trp              | FBgn0003861 | 0.0010501  | 0.27644451 | Female |
| CG10804          | FBgn0029663 | 0.0011418  | 0.27644451 | Female |
| Gr59f            | FBgn0041234 | 0.0011667  | 0.27798942 | Female |
| Gr59e            | FBgn0041233 | 0.001212   | 0.28427081 | Female |
| lncRNA:CR44856   | FBgn0266150 | 0.001297   | 0.28807875 | Female |
| CG42680          | FBgn0261566 | 0.0012996  | 0.28807875 | Female |
| CG43366          | FBgn0263109 | 0.001305   | 0.28807875 | Female |
| DIP-alpha        | FBgn0052791 | 0.0012518  | 0.28807875 | Female |

|                |             |            |            |        |
|----------------|-------------|------------|------------|--------|
| dpr12          | FBgn0085414 | 0.0013361  | 0.29066952 | Female |
| Mlc2           | FBgn0002773 | 0.001376   | 0.29507337 | Female |
| asRNA:CR45830  | FBgn0267480 | 2.80E-05   | 0.23453937 | Male   |
| CG3191         | FBgn0023525 | 3.12E-05   | 0.23453937 | Male   |
| CG32246        | FBgn0052246 | 0.0001453  | 0.24396407 | Male   |
| HDAC1          | FBgn0015805 | 0.00025228 | 0.24396407 | Male   |
| axo            | FBgn0262870 | 0.00026204 | 0.24396407 | Male   |
| Vinc           | FBgn0004397 | 0.00027629 | 0.24396407 | Male   |
| CG14052        | FBgn0029606 | 0.0001953  | 0.24396407 | Male   |
| kz             | FBgn0001330 | 0.00024332 | 0.24396407 | Male   |
| fs(1)K10       | FBgn0000810 | 0.00026701 | 0.24396407 | Male   |
| Or2a           | FBgn0023523 | 0.00015096 | 0.24396407 | Male   |
| CG3091         | FBgn0029608 | 0.00027096 | 0.24396407 | Male   |
| CG3078         | FBgn0023524 | 0.00018535 | 0.24396407 | Male   |
| temp           | FBgn0027296 | 0.00015816 | 0.24396407 | Male   |
| CG3071         | FBgn0023527 | 0.00020196 | 0.24396407 | Male   |
| CG2918         | FBgn0023529 | 0.00024549 | 0.24396407 | Male   |
| Vml            | FBgn0085362 | 0.00019039 | 0.24396407 | Male   |
| CG2865         | FBgn0023526 | 0.00015291 | 0.24396407 | Male   |
| crn            | FBgn0000377 | 0.00029422 | 0.24536313 | Male   |
| Src64B         | FBgn0262733 | 0.0003131  | 0.24736548 | Male   |
| lncRNA:CR45438 | FBgn0266987 | 0.0003672  | 0.27533586 | Male   |
| CG2924         | FBgn0023528 | 0.00040353 | 0.27533586 | Male   |
| PsGEF          | FBgn0264598 | 0.00040295 | 0.27533586 | Male   |



85 **Supplementary Table 2. Prior and posterior distributions of evolutionary parameters.**

86

| <b>Parameter</b> | <b>Prior range</b>            | <b>Posterior<br/>(2.5%)</b> | <b>Posterior<br/>(median)</b> | <b>Posterior<br/>(97.5%)</b> |
|------------------|-------------------------------|-----------------------------|-------------------------------|------------------------------|
| $N_{eA}$         | $10^2, 10^4$                  | 686                         | 4252                          | 9645                         |
| $N_{eX}/N_{eA}$  | 0.5, 1                        | 0.529                       | 0.805                         | 0.990                        |
| $k$              | 0.25, 0.4                     | 0.252                       | 0.316                         | 0.396                        |
| $\bar{s}$        | $10^{-5}, 3.5 \times 10^{-3}$ | $1.9 \times 10^{-4}$        | $1.2 \times 10^{-3}$          | $2.2 \times 10^{-3}$         |
| $r$              | 0, 1                          | 0.050                       | 0.636                         | 0.987                        |
| $h$              | 0, 1                          | 0.012                       | 0.314                         | 0.914                        |

87

88

89 **Supplementary Text 1. Sex-specific contributions of the X to the additive genetic**  
 90 **variance under mutation-selection balance.**

91 In females, the X-linked and autosomal additive genetic variances are given by:

$$92 \quad V_{A,f}^X = \sum_{i=1}^{n_X} 2p_i q_i (s_{f,i} h_i + s_{f,i} q_i (1 - 2h_i))^2 \approx \sum_{i=1}^{n_X} \frac{6u_i s_{f,i} h_i^2}{2h_i + s_{m,i}/s_{f,i}}$$

$$93 \quad V_{A,f}^{aut.} = \sum_{i=1}^{n_A} 2p_i q_i (s_{f,i} h_i + s_{f,i} q_i (1 - 2h_i))^2 \approx \sum_{i=1}^{n_A} \frac{4u_i s_{f,i} h_i}{1 + s_{m,i}/s_{f,i}}$$

94 where  $n_X$  and  $n_A$  represent the number of X-linked and autosomal loci at mutation-selection  
 95 equilibrium. The final approximation is based on mutation-selection balance theory and the  
 96 approximation is to first order in the mutation rate for each locus.

97 In males, the X-linked and autosomal additive genetic variances are given by:

$$98 \quad V_{A,m}^X = \sum_{i=1}^{n_X} p_i q_i s_{m,i}^2 \approx \sum_{i=1}^{n_X} \frac{3u_i s_{m,i}}{1 + 2h_i s_{f,i}/s_{m,i}}$$

$$99 \quad V_{A,m}^{aut.} = \sum_{i=1}^{n_A} 2p_i q_i (s_{m,i} h_i + s_{m,i} q_i (1 - 2h_i))^2 \approx \sum_{i=1}^{n_A} \frac{4u_i s_{m,i} h_i}{1 + s_{f,i}/s_{m,i}}$$

100 To approximate dominance compatible with X-linked and autosomal variances, we assume  
 101 that  $h_i$  and  $s_{m,i}/s_{f,i}$  are constant across loci, and that  $u_i$ ,  $s_{f,i}$ , and  $s_{m,i}$  have the same distribution  
 102 across X-linked and autosomal loci. Under these assumptions, we have:

$$103 \quad V_{A,f}^X \approx \frac{6h^2}{2h + s_m/s_f} \sum_{i=1}^{n_X} u_i s_{f,i} \approx \frac{6h^2}{2h + s_m/s_f} n_X E[u_i s_{f,i}]$$

$$104 \quad V_{A,f}^{aut.} \approx \frac{4h}{1 + s_m/s_f} \sum_{i=1}^{n_A} u_i s_{f,i} \approx \frac{4h}{1 + s_m/s_f} n_A E[u_i s_{f,i}]$$

$$105 \quad V_{A,m}^X \approx \frac{3}{1 + 2h s_f/s_m} \sum_{i=1}^{n_X} u_i s_{m,i} \approx \frac{3}{1 + 2h s_f/s_m} n_X E[u_i s_{m,i}]$$

106 
$$V_{A,m}^{aut.} \approx \frac{4h}{1 + s_f/s_m} \sum_{i=1}^{n_A} u_i s_{m,i} \approx \frac{4h}{1 + s_f/s_m} n_A E[u_i s_{m,i}]$$

107 Using the above approximations, the contribution of the X to the additive genetic variance in  
 108 females and males (respectively) will be:

109 
$$F_X = \frac{V_{A,f}^X}{V_{A,f}^X + V_{A,f}^{aut.}} \approx \frac{3hP_X}{3hP_X + 2(1 - P_X) \frac{2h + s_m/s_f}{1 + s_m/s_f}}$$

110 
$$M_X = \frac{V_{A,m}^X}{V_{A,m}^X + V_{A,m}^{aut.}} \approx \frac{3P_X}{3P_X + 4h(1 - P_X) \frac{1 + 2h s_f/s_m}{1 + s_f/s_m}}$$

111 where  $P_X$  represents the fraction of the haploid genome that is X-linked (e.g., ~20% in *D.*  
 112 *melanogaster*). Solving for  $h$ , we obtain the dominance coefficient consistent with  $F_X$ :

113 
$$h \approx \frac{2 s_m/s_f}{3(1 + s_m/s_f) \frac{P_X(1 - F_X)}{F_X(1 - P_X)} - 4}$$

114 and the dominance coefficient consistent with  $M_X$ :

115 
$$h = \frac{s_m}{4s_f} \sqrt{1 + \frac{6s_f}{s_m} \left(1 + \frac{s_f}{s_m}\right) \frac{P_X(1 - M_X)}{M_X(1 - P_X)}} - \frac{s_m}{4s_f}$$
